# Supplementary material for: 2D MoS2/BiOBr van der Waals heterojunctions by liquid-phase exfoliation as photoelectrocatalysts for hydrogen evolution
Source: Royal Society of Chemistry journal article supplement (doi:10.1039/d2nr04970h), 2022-11-25
Supplement: d2nr04970h1.pdf [file d2nr04970h1.pdf]

Supporting information for:

## 2D MoS<sub>2</sub>/BiOBr van der Waals heterojunctions by liquid-phase exfoliation as photoelectrocatalysts for hydrogen evolution

Mengjiao Wang,<sup>a</sup> Silvio Osella,<sup>b</sup> Rosaria Brescia,<sup>c</sup> Zheming Liu,<sup>d</sup> Jaime Gallego,<sup>a</sup> Mattia Cattelan,<sup>e</sup> Matteo Crisci,<sup>a</sup> Stefano Agnoli<sup>e</sup> and Teresa Gatti<sup>a,f</sup>

<sup>a</sup> Institute of Physical Chemistry and Center for Materials Research (LaMa), Justus Liebig University, 35392 Giessen, Germany

<sup>b</sup> Chemical and Biological Systems Simulation Lab, Centre of New Technologies, University of Warsaw, 02097 Warsaw, Poland

<sup>c</sup> Electron Microscopy Facility, Istituto Italiano di Tecnologia, Via Morego, 30, 16163 Genova, Italy

<sup>d</sup> Nanochemistry Department, Istituto Italiano di Tecnologia, 16163 Genova, Italy

<sup>e</sup> Department of Chemical Sciences, University of Padova, 35131 Padova, Italy

<sup>f</sup> Department of Applied Science and Technology, Politecnico di Torino, 10129 Torino, Italy

### Table of Contents

- SEM images and P-XRD patterns for the precursors used for the synthesis of the LPE HJs (Fig. S1)
- SEM-EDX elemental mapping and spectra of the synthesized HJs (Fig. S2)
- SEM images of the samples (Fig. S3)
- High resolution XPS spectra of as-synthesized 1% MoS<sub>2</sub>/BiOBr HJ (Fig. S4)
- Synthetic parameters used during LPE to synthesize the HJs (Table S1)
- Band gap values of the HJs calculated according to the Tauc method (Table S2)
- STEM-EDX spectra corresponding to the map in Fig. 1g) in the manuscript (Fig. S5)
- HAADF-STEM images and corresponding STEM-EDX maps collected on a MoS<sub>2</sub>/BiOBr HJ (Fig. S6)
- PL excitation spectrum of 2D BiOBr (Fig. S7)
- Optimized structures, charge difference analyses and DOS analyses for two considered interfaces (Fig. S8)
- Cyclic voltammetry curves of the samples (Fig. S9)
- P-XRD pattern of 2D BiOBr after PEC HER (Fig. S10)
- SEM-EDX spectrum of 10% MoS<sub>2</sub>/BiOBr after PEC HER (Fig. S11)

- CV stability test of 1% MoS<sub>2</sub>/BiOBr (Fig. S12)
- High-resolution XPS spectra of O1s on (a) 1% MoS<sub>2</sub>/BiOBr and (b) 10% MoS<sub>2</sub>/BiOBr before PEC HER (Fig. S13)

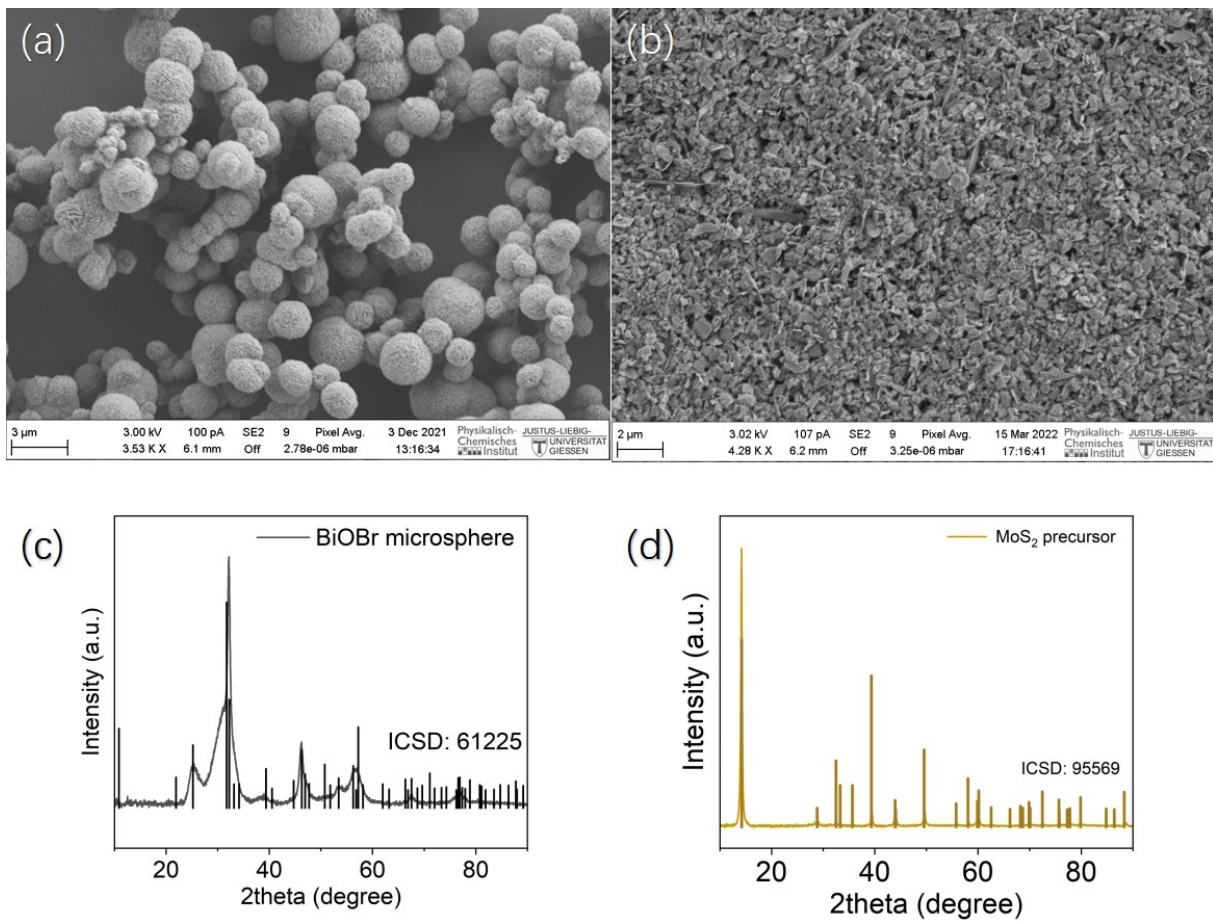

**Fig. S1** (a) SEM image and (c) P-XRD of BiOBr microspheres synthesized by solvothermal method. (b) SEM image and (d) P-XRD of MoS<sub>2</sub> layers. Both materials were used as precursors for the preparation of the HJs.

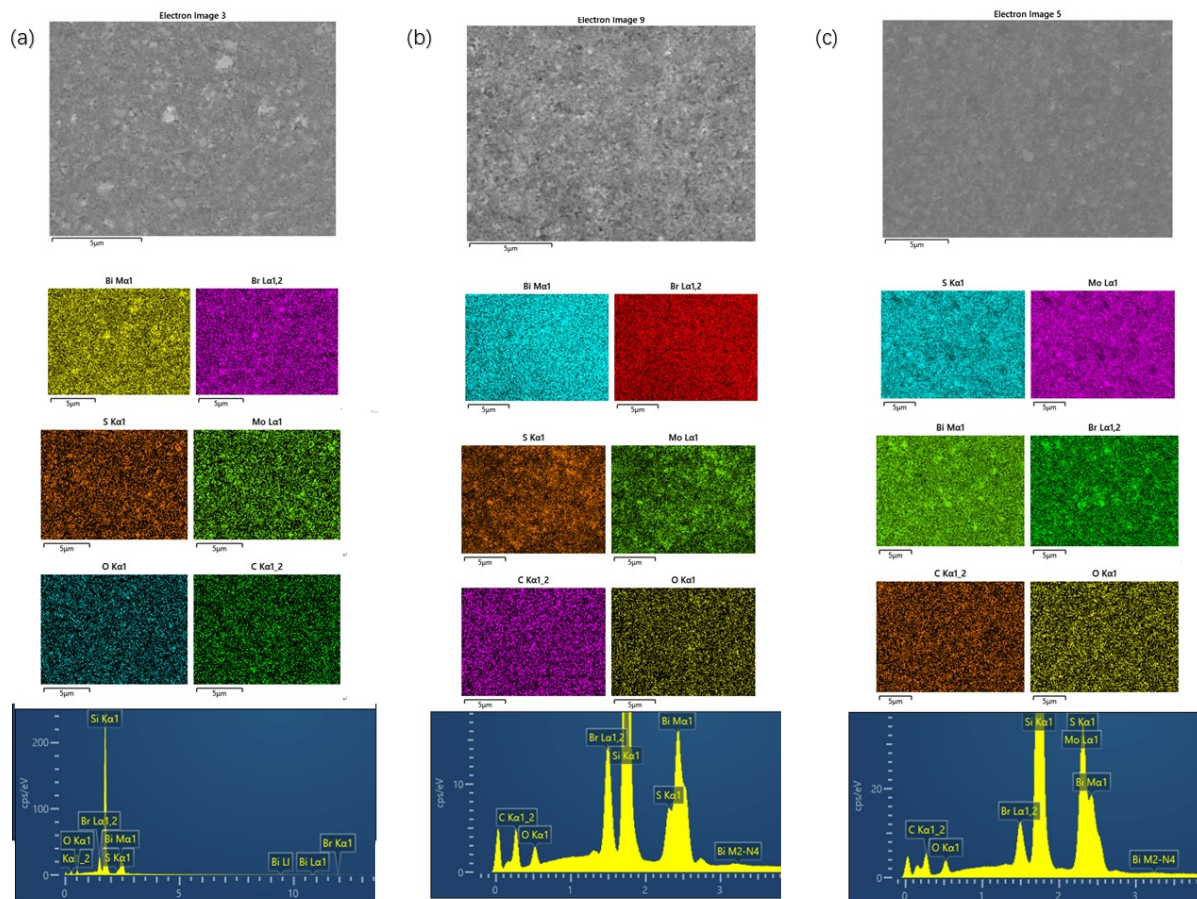

**Fig. S2** SEM-EDX elemental mapping and spectra of (a) 5% MoS<sub>2</sub>/BiOBr, (b) 10% MoS<sub>2</sub>/BiOBr and (c) 50% MoS<sub>2</sub>/BiOBr.

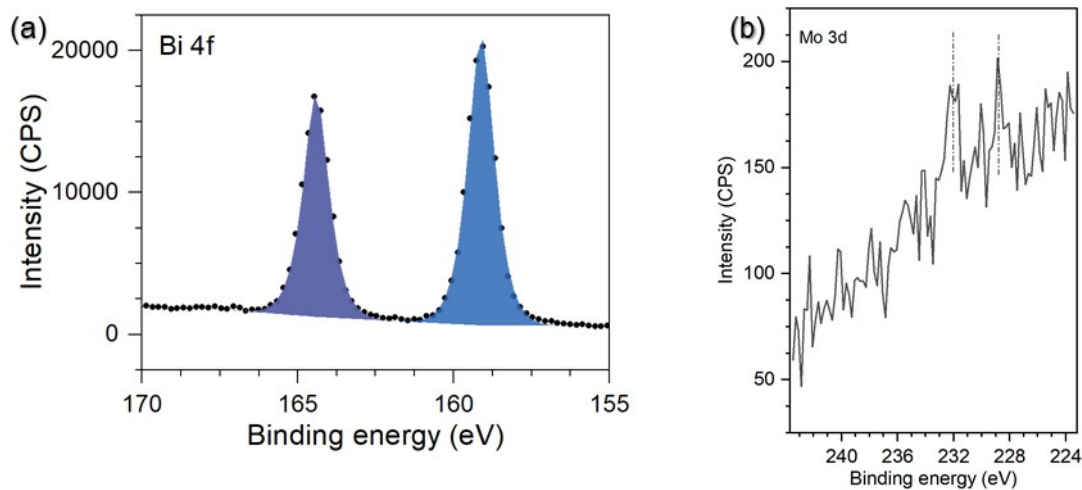

**Fig. S3** High resolution XPS spectra of (a) Bi 4f and (b) Mo 3d in 1% MoS<sub>2</sub>/BiOBr. Two characteristic peaks around 229.4 and 232.5 eV were observed in the XPS spectrum in Fig. S4, indicating existence of the 2H phase of MoS<sub>2</sub>. The weight ratio of MoS<sub>2</sub> is calculated according to the atomic ratio of Mo:Bi.

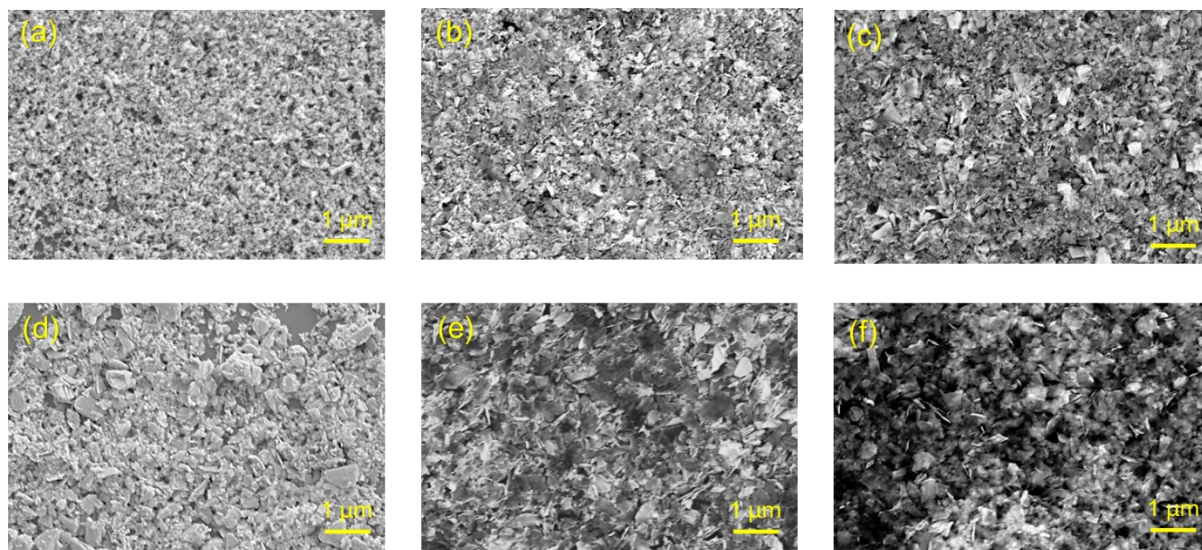

**Fig. S4** SEM images of (a) LPE BiOBr, (b) 1% MoS<sub>2</sub>/BiOBr, (c) 5% MoS<sub>2</sub>/BiOBr, (d) 10% MoS<sub>2</sub>/BiOBr, (e) 50% MoS<sub>2</sub>/BiOBr and (f) LPE MoS<sub>2</sub>.

**Table S1** Weights of the precursors used during LPE to synthesize the MoS<sub>2</sub>/BiOBr HJs and the same estimated in the resulting materials by XPS and SEM-EDX.

| Sample                      | BiOBr microspheres (mg) | MoS <sub>2</sub> layers (mg) | Ratio calculation | Weight ratio of MoS <sub>2</sub> (%) | Br/Bi atomic ratio | O/Bi atomic ratio |
|-----------------------------|-------------------------|------------------------------|-------------------|--------------------------------------|--------------------|-------------------|
| 1% MoS <sub>2</sub> /BiOBr  | 200                     | 2.9                          | XPS               | 0.9                                  | 1.33               | 1.80              |
| 5% MoS <sub>2</sub> /BiOBr  | 200                     | 10                           | SEM-EDX           | 4.8                                  | 1.32               | 1.60              |
| 10% MoS <sub>2</sub> /BiOBr | 200                     | 20                           | SEM-EDX           | 11.2                                 | 1.25               | 1.20              |
| 50% MoS <sub>2</sub> /BiOBr | 100                     | 100                          | SEM-EDX           | 50.2                                 | 1.26               | 2.46              |

**Table S2** Band gap values of the HJs calculated according to the Tauc method.

| Sample                      | Band gap (eV) |
|-----------------------------|---------------|
| 2D BiOBr                    | 3.15          |
| 1% MoS <sub>2</sub> /BiOBr  | 3.01          |
| 5% MoS <sub>2</sub> /BiOBr  | 2.92          |
| 10% MoS <sub>2</sub> /BiOBr | 2.29          |
| 50% MoS <sub>2</sub> /BiOBr | 2.25          |
| 2D MoS <sub>2</sub>         | 1.75          |

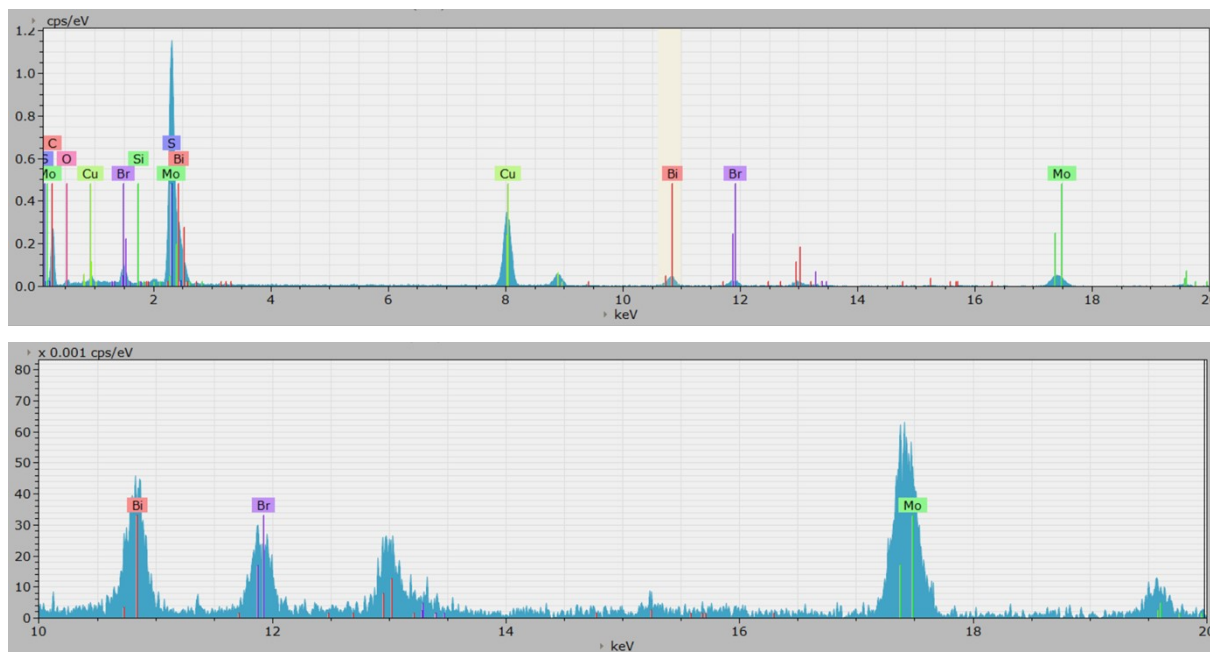

**Fig. S5** STEM-EDX spectra corresponding to the map in Fig. 1g) in the manuscript. The elemental maps reported in Fig. 1g) were obtained by integration of the raw spectra, point by point in the image, in the regions corresponding to Bi  $L\alpha$  peak (centered at 10.8 keV) and the Mo  $K\alpha$  peak (centered at 17.5 keV).

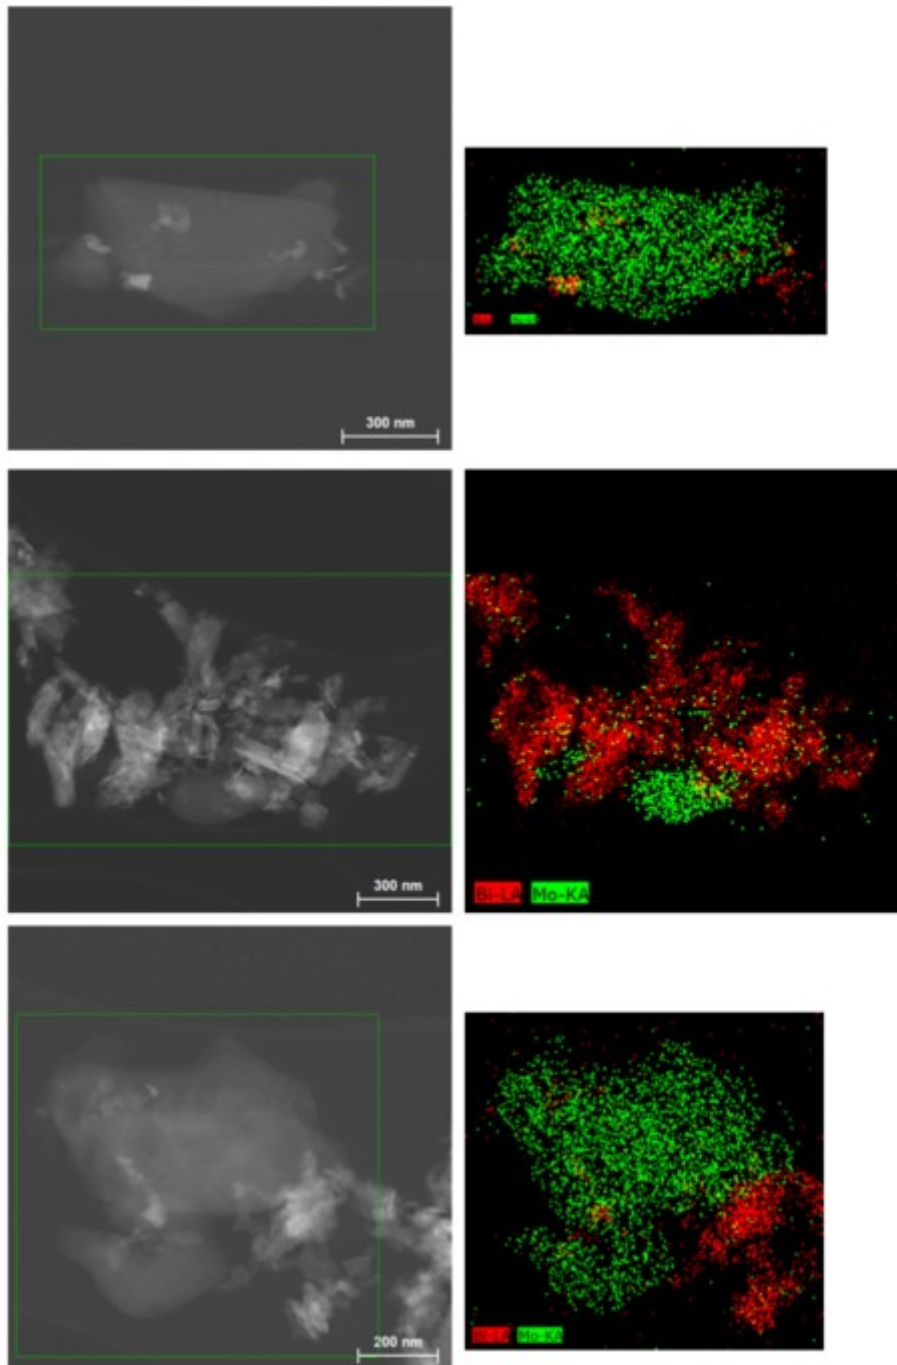

**Fig. S6** (left) HAADF-STEM images and (right) corresponding STEM-EDX maps collected on a MoS<sub>2</sub>/BiOBr HJ. The comparison between each HAADF-STEM image and the corresponding STEM-EDX map clearly shows a difference in the contrast and morphology of the two components: the MoS<sub>2</sub> flakes are hundreds nanometers extended, lower contrast components, while the BiOBr nanoplatelets are typically less than 100 nm extension and stronger contrast, due to higher atomic number. This image can be correlated with BF-TEM images in Fig. 1b-e in the manuscript, where the MoS<sub>2</sub> flakes appear instead less dark than the BiOBr platelets.

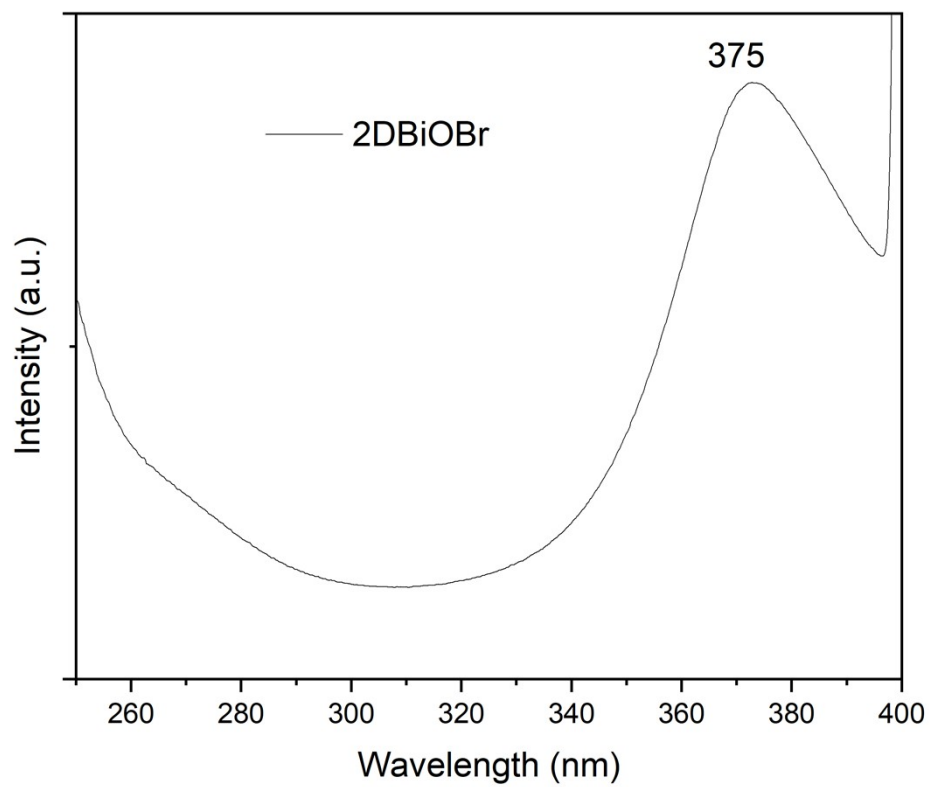

**Fig. S7** PL excitation spectrum of 2D BiOBr.

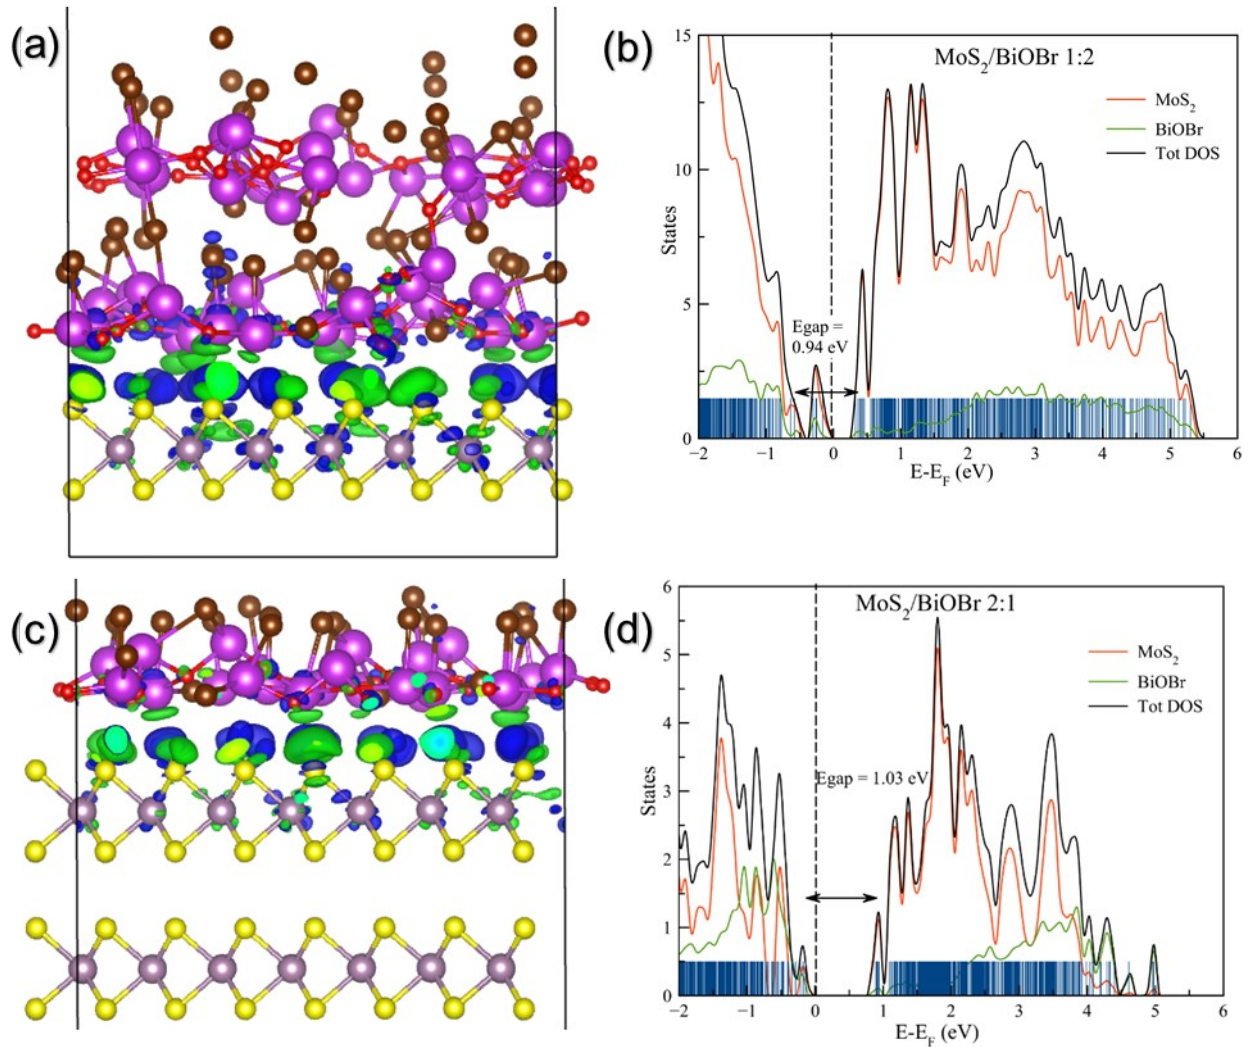

**Fig. S8** Optimized structures and charge difference analyses for the three considered interfaces: (a) 1-MoS<sub>2</sub>/2-BiOBr and (b) 2-MoS<sub>2</sub>/1-BiOBr. The MoS<sub>2</sub>/BiOBr interlayer distance is measured in the 0.270-0.292 nm window depending on the number of layers present. The atoms are represented with the following colors; yellow: sulfur, gray: molybdenum, red: oxygen, purple: bismuth, brown: bromine. Blue surface represents negative charge; green surface the positive charge. (c) Total and partial DOS analyses for 1-MoS<sub>2</sub>/1-BiOBr and (d) 2-MoS<sub>2</sub>/1-BiOBr. The Fermi energy is set to zero (dotted line), blue vertical lines show the eigenvalues of the interface.



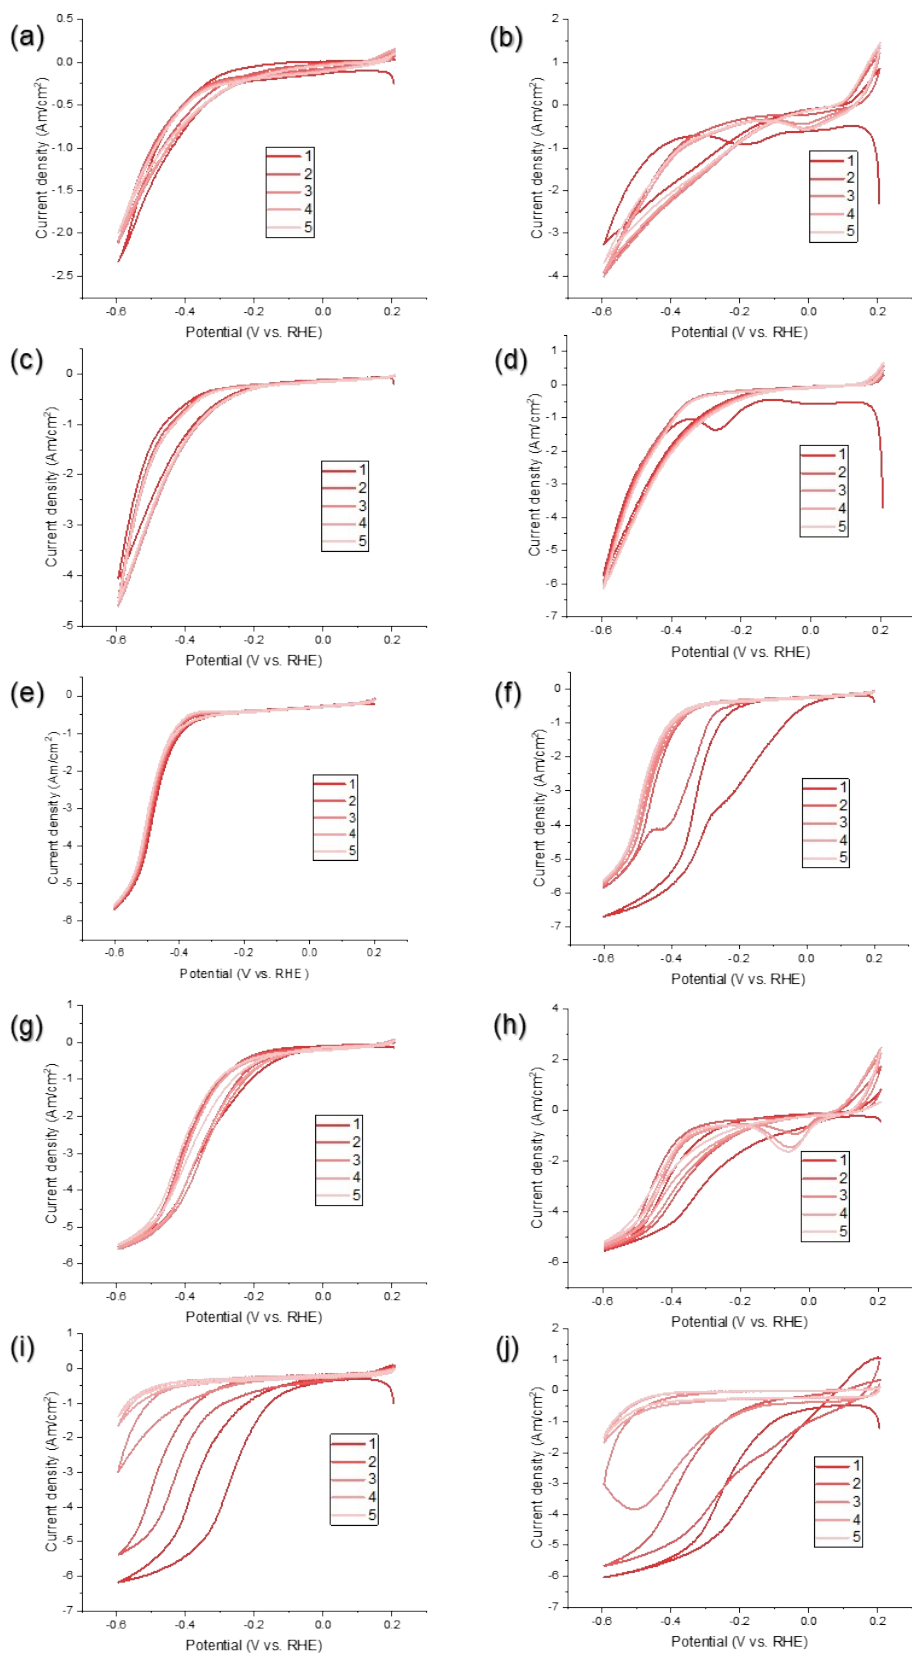

**Fig. S9** Cyclic voltammograms of 2D BiOBr (a) in the dark and (b) with mercury lamp, 1% MoS<sub>2</sub>/BiOBr (c) in the dark and (d) with mercury lamp, 5% MoS<sub>2</sub>/BiOBr (e) in the dark and (f) with mercury lamp, 10% MoS<sub>2</sub>/BiOBr (g) in the dark and (h) with mercury lamp, 50% MoS<sub>2</sub>/BiOBr (i) in the dark and (j) with mercury lamp.

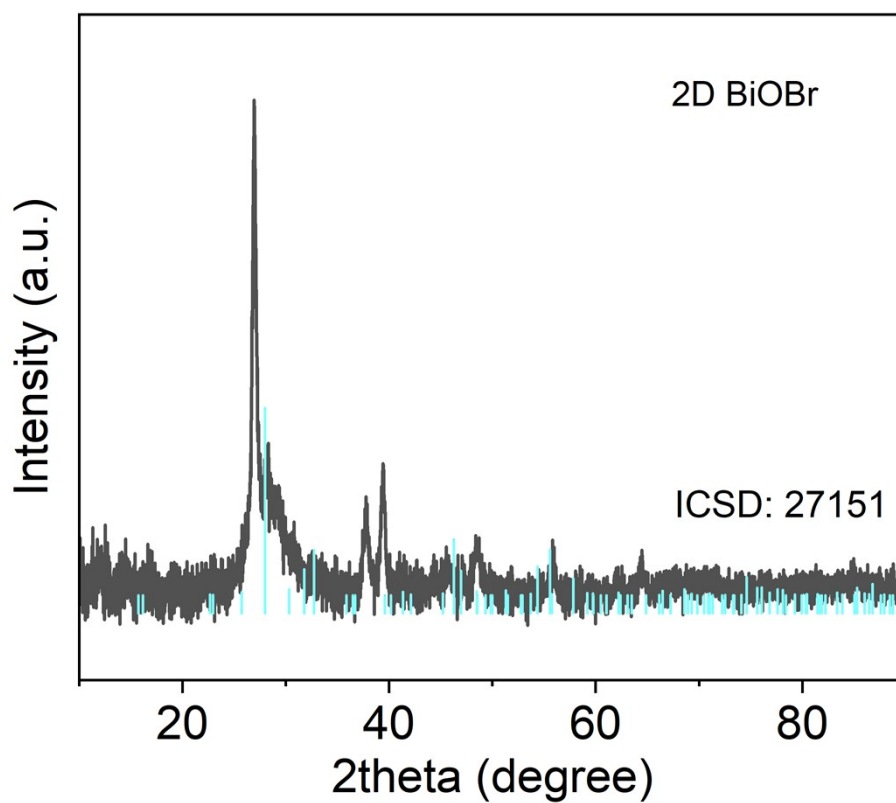

**Fig. S10** P-XRD pattern of 2D BiOBr after PEC HER with the reference structure of Bi<sub>2</sub>O<sub>3</sub> (ICSD number: 27151).

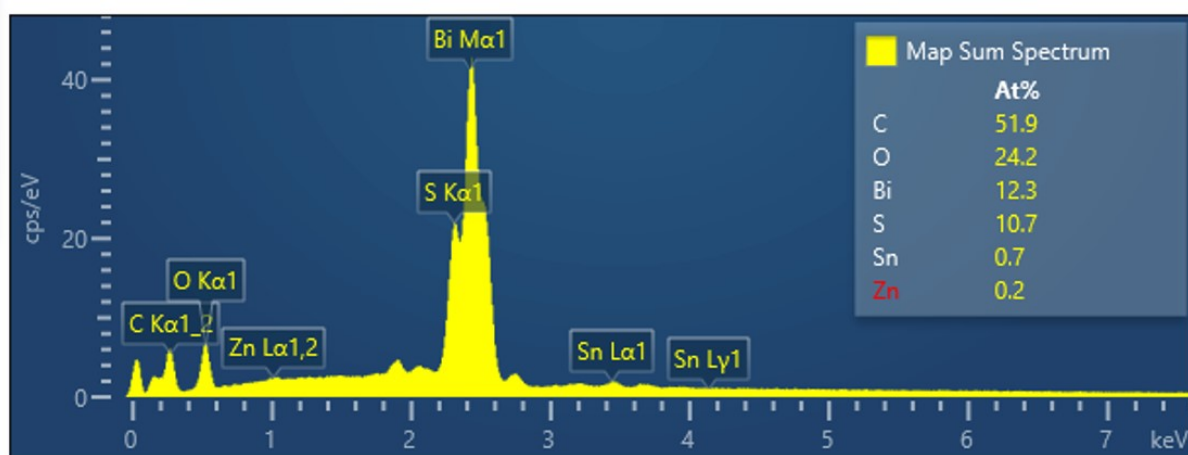

**Fig. S11** SEM-EDX spectrum of 10% MoS<sub>2</sub>/BiOBr after PEC HER.

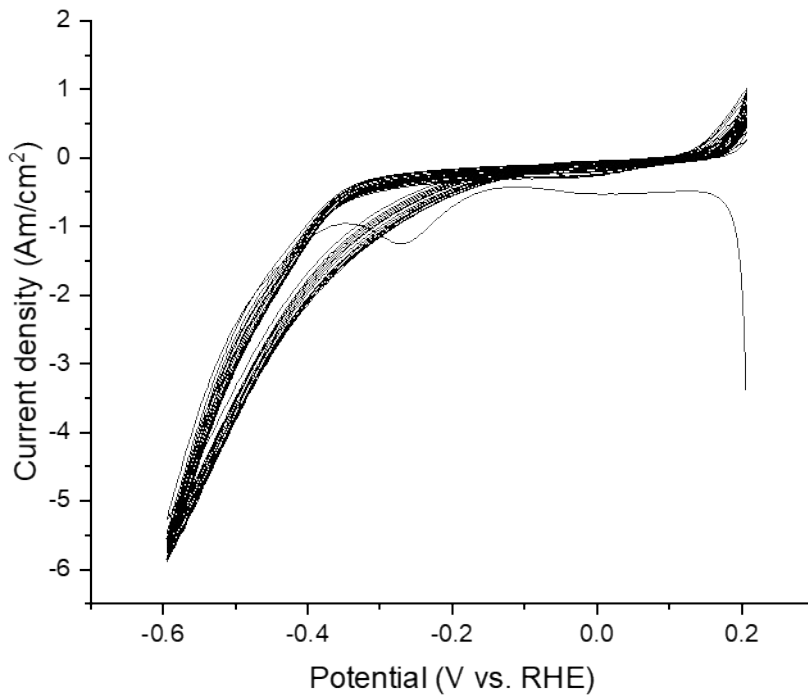

**Fig. S12** CV stability test of 1% MoS<sub>2</sub>/BiOBr. 16 cycles are shown in the figure.

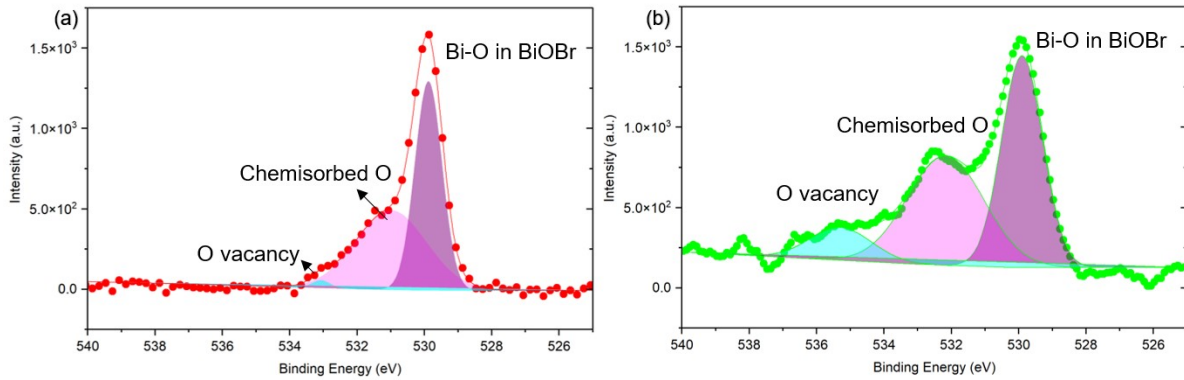

**Fig. S13** High-resolution XPS spectra of O1s on (a) 1% MoS<sub>2</sub>/BiOBr and (b) 10% MoS<sub>2</sub>/BiOBr before PEC HER. In 1% MoS<sub>2</sub>/BiOBr, the synergistic effect between MoS<sub>2</sub> and BiOBr enable the preservation of O vacancies (comparison of Fig 6d and Fig S13a). On the contrary, the peak at 535.3 eV indicates that 10% MoS<sub>2</sub>/BiOBr contains a large amount of O vacancies before PEC HER. However, the O vacancies are consumed rapidly during PEC HER (comparison of Fig 6d and Fig S13b).
